# Supplementary material for: Full course macro-kinematic analysis of a 10 km classical cross-country skiing competition
Source: PLoS One. 2017 Aug 1;12(8):e0182262. doi: 10.1371/journal.pone.0182262 (PMC5538647; doi:10.1371/journal.pone.0182262)
Supplement: S1 Data — (XLSX) [file pone.0182262.s001.xlsx]

## Sheet: 10km Classic Data
2013 Competition Analysis							Overall				Double Pole												Diagonal Stride														Kick Double Pole												Tucking
Trial				Age	Height	Weight	Total Time/Distance/Velocity				Distance & Cycle Length (m)							Time (s) & Cycle Rate (/min)					Distance & Cycle Length (m)								Time (s) & Cycle Rate (/min)						Distance & Cycle Length (m)							Time (s) & Cycle Rate (/min)					Tuck-Dist (m)
Athlete	Sex	Race	Lap	(y)	(cm)	(kg)	Time (m:s)	Time (s)	Dist (m)	Vel (m/s)	DP-d	DP-n	DP-v	DP-CL	DP-d-SD	CV	DP%-d	DP-t	DP-CR	DP-t-SD	CV	DP%-t	DS-d	DS-n	DS-v	DS-CL	DS-CL2	DS-d-SD	CV	DS%-d	DS-t	DS-CR	DS-CR2	DS-t-SD	CV	DS%-t	KDP-d	KDP-n	KDP-v	KDP-CL	KDP-d-SD	CV	KDP%-d	KDP-t	KDP-CR	KDP-t-SD	CV	KDP%-t	Tuck-d
M1	M	10C	Lap 1	23.8247	181.4	69.8	00:15:37.660000	937.66	5468.53	5.89513	2518.04	469	6.0388	5.36896	1.03113	0.192054	46.046	416.31	67.9167	4.70518	0.0692787	44.3988	763.96	202	3.86163	3.78198	1.89099	0.89563	0.236815	13.9701	195.62	63.135	126.27	9.04772	0.143308	20.8626	441.08	79	4.76987	5.58329	0.363663	0.0651341	8.06579	92.52	51.3015	1.9234	0.037492	9.86712	1336.21
M2	M	10C	Lap 1	23.0685	181	80	00:15:47.990000	947.99	5556.74	5.8309	2503.3	329	6.493	7.60881	1.68971	0.222073	45.0498	383.68	51.9936	5.46968	0.105199	40.473	881	210	3.75162	4.19524	2.09762	1.0492	0.250092	15.8546	231.88	55.2429	110.486	7.49373	0.13565	24.4602	454.94	72	4.71684	6.31861	0.364742	0.057725	8.18717	96.44	44.8552	1.67269	0.0372907	10.1731	1069.64
M3	M	10C	Lap 1	22.4384	185.4	86.1	00:15:50.250000	950.25	5427.46	5.81702	2105.25	320	5.7093	6.57891	1.22404	0.186055	38.7889	368.586	52.397	4.19591	0.0800791	38.7883	571.89	143.5	3.54908	3.9853	1.99265	0.985115	0.247187	10.537	159.27	55.5211	111.042	9.98847	0.179904	16.7609	498.26	83	4.46889	6.00313	0.566746	0.0944083	9.18035	111.41	44.8892	3.00115	0.0668567	11.7243	1630.48
M4	M	10C	Lap 1	29.1863	174	70	00:15:51.411000	951.411	5578.45	5.80992	2494.59	343	6.43864	7.27286	1.75126	0.240794	44.7183	384.421	54.4097	7.21361	0.13258	40.4054	733.45	194	3.60539	3.78067	1.89034	0.961779	0.254394	13.1479	201.5	59.4568	118.914	10.7754	0.181231	21.1791	644.8	100	4.8285	6.448	0.4565	0.0707971	11.5588	133.71	44.9723	2.16153	0.0480635	14.0539	1114.74
M5	M	10C	Lap 1	22.7808	191.7	82.56	00:16:22.742000	982.742	5478.87	5.62081	2330.65	375	5.59668	6.21507	1.40511	0.226082	42.5389	416.802	54.6128	6.16134	0.112819	42.4121	846.85	248	3.43527	3.41472	1.70736	0.847419	0.248167	15.4567	245.19	61.8596	123.719	9.07337	0.146677	24.9496	29.65	5	4.66511	5.93	0.256125	0.0431914	0.54117	6.36	47.2327	1.91569	0.0405585	0.647169	1752.75
M6	M	10C	Lap 1	34.263	177.7	67.7	00:17:51.740000	1071.74	5542.3	5.15762	2391.3	422	5.67659	5.66659	1.20629	0.212878	43.1463	422.11	60.6632	6.5903	0.108638	39.3855	1156.71	350.5	3.27271	3.30017	1.65009	0.97196	0.294518	20.8706	348.78	61.1499	122.3	7.46479	0.122074	32.5433	84.13	15	4.1607	5.60867	0.597995	0.10662	1.51796	20.18	44.7549	2.82722	0.0631712	1.88292	1275.43
M7	M	10C	Lap 1	20.011	178.6	82.75	00:17:47.531000	1067.53	5567.65	5.17795	2767.22	471	5.05185	5.8752	1.51816	0.258402	49.7018	544.37	52.2562	4.29312	0.0821551	50.9934	616.76	196	3.04453	3.14673	1.57337	0.807685	0.256674	11.0776	200.54	59.6351	119.27	7.69223	0.128988	18.7854	22.33	5	3.49844	4.466	0.417528	0.0934905	0.401067	6.38	47.1935	3.21544	0.0681331	0.597641	1471.76
M8	M	10C	Lap 1	40.3753	186.2	77.8	00:18:10.380000	1090.38	5517.02	5.06945	1965.92	268	5.67306	7.33552	1.37617	0.187604	35.6337	345.51	46.7636	3.29218	0.0704005	31.6871	936.6	251	3.29983	3.73147	1.86574	0.960601	0.257432	16.9766	280.09	55.0384	110.077	8.70856	0.158227	25.6874	617.7	112	3.99455	5.51518	0.511764	0.092792	11.1963	154.53	43.6023	2.26745	0.0520031	14.1721	1271.68
M1	M	10C	Lap 2	23.8247	181.4	69.8	00:16:21.150000	981.15	5508.87	5.63382	2448.07	471	5.78721	5.1976	0.984274	0.189371	44.4387	421.93	67.3849	5.22436	0.07753	43.0036	793.25	215	3.86305	3.68953	1.84477	0.900627	0.244103	14.3995	202.75	64.8304	129.661	9.42166	0.145328	20.6645	465.91	88	4.48127	5.29443	0.333032	0.0629022	8.45745	103.94	50.8655	1.86315	0.036629	10.5937	1342.24
M2	M	10C	Lap 2	23.0685	181	80	00:16:33.560000	993.56	5573.07	5.56345	2316.14	308	6.33256	7.51994	1.56508	0.208124	41.5595	364.44	51.1212	4.68228	0.0915918	36.6802	952.55	233	3.60444	4.0882	2.0441	1.01571	0.24845	17.092	260.83	54.6476	109.295	8.12522	0.148684	26.2521	484.58	78	4.55297	6.21256	0.444065	0.0714785	8.69503	106.47	44.0029	1.4361	0.0326366	10.716	1151.7
M3	M	10C	Lap 2	22.4384	185.4	86.1	00:16:34.320000	994.32	5479.82	5.5592	2129.11	337	5.66321	6.31783	1.03886	0.164433	38.8536	376.347	54.034	4.12619	0.0763628	37.8497	685.82	176.5	3.51152	3.88567	1.94283	0.981883	0.252694	12.5154	192.58	56.2846	112.569	9.16691	0.162867	19.368	516.26	90	4.33887	5.73622	0.440452	0.0767843	9.42111	118.92	45.5196	2.30305	0.0505948	11.9599	1604.03
M4	M	10C	Lap 2	29.1863	174	70	00:16:59.570000	1019.57	5601.6	5.42153	2505.02	376	6.07873	6.66229	1.56452	0.234833	44.7197	408.91	55.848	6.15859	0.110274	40.1061	977	263	3.50745	3.71483	1.85741	0.975427	0.262577	17.4414	274.73	58.8965	117.793	9.87122	0.167603	26.9457	313.51	52	4.61124	6.02904	0.379821	0.0629986	5.59679	68.04	45.94	1.99461	0.0434178	6.6734	1100.07
M5	M	10C	Lap 2	22.7808	191.7	82.56	00:17:02.049000	1022.05	5461.02	5.40838	2383.39	393	5.39263	6.06461	1.3296	0.21924	43.6437	441.447	53.7776	4.40525	0.0819161	43.1924	910.64	256	3.45239	3.55719	1.77859	0.772874	0.217271	16.6753	262.04	59.8583	119.717	9.36543	0.15646	25.6387	0	0	N/A	N/A	N/A	N/A	0	0	N/A	N/A	N/A	0	1567.79
M6	M	10C	Lap 2	34.263	177.7	67.7	00:19:03.110000	1143.11	5557.42	4.8356	2562.14	467	5.4173	5.48638	1.20466	0.219573	46.103	474.37	59.4293	4.61296	0.077621	41.4982	1195.76	380	3.07735	3.14674	1.57337	0.919897	0.292334	21.5165	384.17	60.0666	120.133	6.72574	0.111971	33.6074	11.46	2	4.13906	5.73	0.919239	0.160426	0.206211	2.76	43.664	4.02719	0.0922313	0.241447	1057.52
M7	M	10C	Lap 2	20.011	178.6	82.75	00:19:33.510000	1173.51	5567.18	4.71033	2801.95	518	4.67345	5.40917	1.50177	0.277635	50.3298	596.58	52.3791	3.80222	0.0725903	50.8372	676.73	242	2.78759	2.7964	1.3982	0.77092	0.275682	12.1557	241.93	61.3155	122.631	9.04121	0.147454	20.6159	27.43	5	4.194	5.486	0.407284	0.0742406	0.492709	6.54	45.956	2.26717	0.0493335	0.557302	1332.15
M8	M	10C	Lap 2	40.3753	186.2	77.8	00:19:30.500000	1170.5	5556.26	4.72245	1641.05	237	5.42713	6.92426	1.13574	0.164024	29.5352	302.02	47.3805	3.76428	0.079448	25.8026	1544.32	397	3.34661	3.88997	1.94499	0.923946	0.23752	27.7942	456.16	53.3614	106.723	8.36807	0.156819	38.9714	216.56	37	4.16405	5.85297	0.312915	0.0534626	3.89759	52.05	42.7049	1.51532	0.0354834	4.44682	1421.65
All			Average	26.9935	182	77.0887	00:17:11.092000	1031.09	5527.64	5.3896	2366.45	381.5	5.71563	6.344	1.3454	0.212698	42.8004	416.74	55.148	4.91859	0.0892802	40.4696	890.206	247.344	3.43565	3.63155	1.81578	0.921292	0.254744	16.0926	258.629	58.7687	117.537	8.77061	0.149578	24.8308	301.788	51.4375	4.37229	5.74761	0.451458	0.0790967	5.46346	67.5156	45.8303	2.29274	0.0502597	6.76918	1343.74
			SD	6.82571	5.4	6.76947	00:01:19.619000	79.6191	51.0856	0.399803	293.083	81.9065	0.488032	0.815273	0.239387	0.0315927	5.17883	72.9101	6.03525	1.11847	0.0187356	6.16417	247.866	71.6402	0.294345	0.381036	0.190518	0.0839838	0.019676	4.42666	78.6481	3.37558	6.75115	1.06935	0.0190743	6.00121	239.838	40.6857	0.354898	0.480976	0.158623	0.0283805	4.34499	53.7002	2.47459	0.704095	0.0162984	5.43213	216.905
			Min	20.011	174	67.7	00:15:37.660000	937.66	5427.46	4.71033	1641.05	237	4.67345	5.1976	0.984274	0.164024	29.5352	302.02	46.7636	3.29218	0.0692787	25.8026	571.89	143.5	2.78759	2.7964	1.3982	0.77092	0.217271	10.537	159.27	53.3614	106.723	6.72574	0.111971	16.7609	0	0	3.49844	4.466	0.256125	0.0431914	0	0	42.7049	1.4361	0.0326366	0	1057.52
			Max	40.3753	191.7	86.1	00:19:33.510000	1173.51	5601.6	5.89513	2801.95	518	6.493	7.60881	1.75126	0.277635	50.3298	596.58	67.9167	7.21361	0.13258	50.9934	1544.32	397	3.86305	4.19524	2.09762	1.0492	0.294518	27.7942	456.16	64.8304	129.661	10.7754	0.181231	38.9714	644.8	112	4.8285	6.448	0.919239	0.160426	11.5588	154.53	51.3015	4.02719	0.0922313	14.1721	1752.75
Male			Average	26.9935	182	77.0887	00:16:39.963000	999.963	5517.13	5.54735	2384.53	374.625	5.83474	6.49024	1.40023	0.215743	43.203	410.224	55.1266	5.24016	0.0951435	41.068	813.402	224.375	3.47751	3.66704	1.83352	0.934923	0.25566	14.7364	232.859	58.8798	117.76	8.78054	0.149507	23.1535	349.111	58.875	4.38786	5.73411	0.441883	0.0780198	6.33107	77.6912	46.1002	2.37307	0.0516961	7.88978	1365.34
Lap 1			SD	7.06528	5.58953	7.00707	00:01:05.028000	65.0282	53.9595	0.351557	252.608	73.5565	0.474508	0.843101	0.246815	0.0262864	4.36293	60.3664	6.44164	1.34625	0.0229095	5.45417	186.915	61.1209	0.269107	0.354468	0.177234	0.07903	0.0170285	3.3498	59.3434	3.21396	6.42792	1.20549	0.0220987	4.90795	262.006	43.7572	0.467382	0.616041	0.114784	0.0219974	4.7423	58.8359	2.44568	0.569232	0.0129742	5.89193	238.942
			Min	20.011	174	67.7	00:15:37.660000	937.66	5427.46	5.06945	1965.92	268	5.05185	5.36896	1.03113	0.186055	35.6337	345.51	46.7636	3.29218	0.0692787	31.6871	571.89	143.5	3.04453	3.14673	1.57337	0.807685	0.236815	10.537	159.27	55.0384	110.077	7.46479	0.122074	16.7609	22.33	5	3.49844	4.466	0.256125	0.0431914	0.401067	6.36	43.6023	1.67269	0.0372907	0.597641	1069.64
			Max	40.3753	191.7	86.1	00:18:10.380000	1090.38	5578.45	5.89513	2767.22	471	6.493	7.60881	1.75126	0.258402	49.7018	544.37	67.9167	7.21361	0.13258	50.9934	1156.71	350.5	3.86163	4.19524	2.09762	1.0492	0.294518	20.8706	348.78	63.135	126.27	10.7754	0.181231	32.5433	644.8	112	4.8285	6.448	0.597995	0.10662	11.5588	154.53	51.3015	3.21544	0.0681331	14.1721	1752.75
Male			Average	26.9935	182	77.0887	00:17:42.221000	1062.22	5538.15	5.23185	2348.36	388.375	5.59653	6.19776	1.29057	0.209654	42.3979	423.256	55.1693	4.59702	0.0834168	39.8713	967.009	270.312	3.3938	3.59607	1.79803	0.907661	0.253829	17.4488	284.399	58.6576	117.315	8.76068	0.149648	26.508	254.464	44	4.35449	5.76303	0.462401	0.0803275	4.59586	57.34	45.5218	2.20094	0.0486181	5.64858	1322.14
Lap 2			SD	7.06528	5.58953	7.00707	00:01:24.501000	84.501	49.2749	0.402549	345.699	94.1123	0.502783	0.815225	0.23454	0.0377708	6.16981	87.4645	6.04617	0.79491	0.012197	7.13133	288.499	77.8217	0.330504	0.427309	0.213654	0.0918896	0.0231887	5.1541	90.6374	3.74954	7.49909	0.998467	0.0170666	6.83053	222.476	38.8072	0.195815	0.310663	0.207549	0.0362153	4.0305	49.8102	2.66495	0.871944	0.0204338	5.06423	206.536
			Min	20.011	174	67.7	00:16:21.150000	981.15	5461.02	4.71033	1641.05	237	4.67345	5.1976	0.984274	0.164024	29.5352	302.02	47.3805	3.76428	0.0725903	25.8026	676.73	176.5	2.78759	2.7964	1.3982	0.77092	0.217271	12.1557	192.58	53.3614	106.723	6.72574	0.111971	19.368	0	0	4.13906	5.29443	0.312915	0.0534626	0	0	42.7049	1.4361	0.0326366	0	1057.52
			Max	40.3753	191.7	86.1	00:19:33.510000	1173.51	5601.6	5.63382	2801.95	518	6.33256	7.51994	1.56508	0.277635	50.3298	596.58	67.3849	6.15859	0.110274	50.8372	1544.32	397	3.86305	4.0882	2.0441	1.01571	0.292334	27.7942	456.16	64.8304	129.661	9.87122	0.167603	38.9714	516.26	90	4.61124	6.21256	0.919239	0.160426	9.42111	118.92	50.8655	4.02719	0.0922313	11.9599	1604.03
Male 1			Average	24.6295	180.45	76.475	00:15:46.828000	946.828	5507.79	5.83824	2405.29	365.25	6.16993	6.70738	1.42404	0.210244	43.6508	388.249	56.6792	5.39609	0.0967841	41.0164	737.575	187.375	3.69193	3.9358	1.9679	0.97293	0.247122	13.3774	197.068	58.3389	116.678	9.32633	0.160023	20.8157	509.77	83.5	4.69603	6.08826	0.437913	0.0720161	9.24802	108.52	46.5046	2.18969	0.0474258	11.4546	1287.77
Lap 1			SD	3.09031	4.73674	7.99057	00:00:06.275000	6.27472	71.6082	0.0389107	200.264	69.8111	0.367856	0.989989	0.352151	0.0257499	3.29	20.0797	7.56579	1.31992	0.0282119	2.38564	127.456	29.9705	0.141724	0.197892	0.098946	0.0634155	0.00748196	2.2067	29.7898	3.73172	7.46345	1.41118	0.0239336	3.1548	93.2563	11.9024	0.15814	0.385017	0.0962815	0.0158587	1.61938	18.662	3.19834	0.576617	0.0138968	1.91409	256.461
Top 4			Min	22.4384	174	69.8	00:15:37.660000	937.66	5427.46	5.80992	2105.25	320	5.7093	5.36896	1.03113	0.186055	38.7889	368.586	51.9936	4.19591	0.0692787	38.7883	571.89	143.5	3.54908	3.78067	1.89034	0.89563	0.236815	10.537	159.27	55.2429	110.486	7.49373	0.13565	16.7609	441.08	72	4.46889	5.58329	0.363663	0.057725	8.06579	92.52	44.8552	1.67269	0.0372907	9.86712	1069.64
			Max	29.1863	185.4	86.1	00:15:51.411000	951.411	5578.45	5.89513	2518.04	469	6.493	7.60881	1.75126	0.240794	46.046	416.31	67.9167	7.21361	0.13258	44.3988	881	210	3.86163	4.19524	2.09762	1.0492	0.254394	15.8546	231.88	63.135	126.27	10.7754	0.181231	24.4602	644.8	100	4.8285	6.448	0.566746	0.0944083	11.5588	133.71	51.3015	3.00115	0.0668567	14.0539	1630.48
Male 1			Average	29.3575	183.55	77.7025	00:17:33.098000	1053.1	5526.46	5.25646	2363.77	384	5.49955	6.27309	1.37643	0.221241	42.7552	432.198	53.574	5.08423	0.0935029	41.1195	889.23	261.375	3.26308	3.39827	1.69914	0.896916	0.264198	16.0953	268.65	59.4207	118.841	8.23474	0.138992	25.4914	188.452	34.25	4.0797	5.37996	0.445853	0.0840234	3.41412	46.8625	45.6959	2.55645	0.0559665	4.32496	1442.91
Lap 1			SD	9.59283	6.63752	7.05058	00:00:47.944000	47.9435	37.8657	0.247424	328.081	86.6987	0.30073	0.74348	0.128917	0.0294718	5.74949	82.5352	5.75771	1.55625	0.0205317	7.98208	223.477	64.5592	0.162127	0.247783	0.123891	0.0818524	0.0206454	4.04827	62.5594	3.06535	6.13069	0.777807	0.0164859	5.62827	287.49	52.0473	0.481104	0.63468	0.14639	0.0279545	5.21183	72.073	1.81415	0.577836	0.0122889	6.59164	226.717
Low 4			Min	20.011	177.7	67.7	00:16:22.742000	982.742	5478.87	5.06945	1965.92	268	5.05185	5.66659	1.20629	0.187604	35.6337	345.51	46.7636	3.29218	0.0704005	31.6871	616.76	196	3.04453	3.14673	1.57337	0.807685	0.248167	11.0776	200.54	55.0384	110.077	7.46479	0.122074	18.7854	22.33	5	3.49844	4.466	0.256125	0.0431914	0.401067	6.36	43.6023	1.91569	0.0405585	0.597641	1271.68
			Max	40.3753	191.7	82.75	00:18:10.380000	1090.38	5567.65	5.62081	2767.22	471	5.67659	7.33552	1.51816	0.258402	49.7018	544.37	60.6632	6.5903	0.112819	50.9934	1156.71	350.5	3.43527	3.73147	1.86574	0.97196	0.294518	20.8706	348.78	61.8596	123.719	9.07337	0.158227	32.5433	617.7	112	4.66511	5.93	0.597995	0.10662	11.1963	154.53	47.2327	3.21544	0.0681331	14.1721	1752.75
Male 1			Average	24.6295	180.45	76.475	00:16:37.150000	997.15	5540.84	5.5445	2349.58	373	5.96543	6.42441	1.28819	0.19919	42.3929	392.907	57.097	5.04785	0.0889397	39.4099	852.155	221.875	3.62161	3.84456	1.92228	0.968412	0.251956	15.3621	232.722	58.6648	117.33	9.14625	0.15612	23.3076	445.065	77	4.49609	5.81806	0.399342	0.0685409	8.0426	99.3425	46.582	1.89923	0.0408195	9.98576	1299.51
Lap 2			SD	3.09031	4.73674	7.99057	00:00:16.120000	16.1199	56.2022	0.088838	166.92	71.0258	0.300403	0.961454	0.320187	0.0297472	2.75803	26.9755	7.12961	0.865638	0.0158172	2.78597	137.602	36.1533	0.16707	0.184311	0.0921556	0.0485205	0.00790159	2.33429	41.087	4.46736	8.93471	0.740353	0.0107881	3.84758	90.1321	17.4738	0.117518	0.400429	0.0531296	0.00680918	1.68127	21.8713	2.97436	0.35961	0.00789152	2.29288	228.168
Top 4			Min	22.4384	174	69.8	00:16:21.150000	981.15	5479.82	5.42153	2129.11	308	5.66321	5.1976	0.984274	0.164433	38.8536	364.44	51.1212	4.12619	0.0763628	36.6802	685.82	176.5	3.50745	3.68953	1.84477	0.900627	0.244103	12.5154	192.58	54.6476	109.295	8.12522	0.145328	19.368	313.51	52	4.33887	5.29443	0.333032	0.0629022	5.59679	68.04	44.0029	1.4361	0.0326366	6.6734	1100.07
			Max	29.1863	185.4	86.1	00:16:59.570000	1019.57	5601.6	5.63382	2505.02	471	6.33256	7.51994	1.56508	0.234833	44.7197	421.93	67.3849	6.15859	0.110274	43.0036	977	263	3.86305	4.0882	2.0441	1.01571	0.262577	17.4414	274.73	64.8304	129.661	9.87122	0.167603	26.9457	516.26	90	4.61124	6.21256	0.444065	0.0767843	9.42111	118.92	50.8655	2.30305	0.0505948	11.9599	1604.03
Male 1			Average	29.3575	183.55	77.7025	00:18:47.292000	1127.29	5535.47	4.91919	2347.13	403.75	5.22763	5.9711	1.29295	0.220118	42.4029	453.604	53.2416	4.14618	0.0778939	40.3326	1081.86	318.75	3.16598	3.34758	1.67379	0.846909	0.255702	19.5354	336.075	58.6504	117.301	8.37511	0.143176	29.7084	63.8625	11	4.1657	5.68966	0.546479	0.0960429	1.14913	15.3375	44.1083	2.60322	0.0590161	1.31139	1344.78
Lap 2			SD	9.59283	6.63752	7.05058	00:01:11.483000	71.4827	49.8744	0.330967	500.984	122.44	0.369737	0.699518	0.160686	0.046389	9.01194	121.104	4.95552	0.427847	0.00394953	10.504	374.294	81.0406	0.297597	0.476885	0.238443	0.0866361	0.0343929	6.70257	101.781	3.58428	7.16857	1.17542	0.0212494	8.16988	102.418	17.4547	0.027507	0.186783	0.326249	0.0567167	1.84341	24.6214	1.67049	1.28921	0.0295871	2.1027	214.725
Low 4			Min	20.011	177.7	67.7	00:17:02.049000	1022.05	5461.02	4.71033	1641.05	237	4.67345	5.40917	1.13574	0.164024	29.5352	302.02	47.3805	3.76428	0.0725903	25.8026	676.73	242	2.78759	2.7964	1.3982	0.77092	0.217271	12.1557	241.93	53.3614	106.723	6.72574	0.111971	20.6159	0	0	4.13906	5.486	0.312915	0.0534626	0	0	42.7049	1.51532	0.0354834	0	1057.52
			Max	40.3753	191.7	82.75	00:19:33.510000	1173.51	5567.18	5.40838	2801.95	518	5.42713	6.92426	1.50177	0.277635	50.3298	596.58	59.4293	4.61296	0.0819161	50.8372	1544.32	397	3.45239	3.88997	1.94499	0.923946	0.292334	27.7942	456.16	61.3155	122.631	9.36543	0.156819	38.9714	216.56	37	4.194	5.85297	0.919239	0.160426	3.89759	52.05	45.956	4.02719	0.0922313	4.44682	1567.79
[truncated: 48 more columns]
